# Supplementary material for: Dye-sensitized solar cells containing mesoporous TiO2spheres as photoanodes and methyl sulfate anion based biionic liquid electrolytes
Source: Royal Society of Chemistry journal article supplement (doi:10.1039/c5ta00316d), 2015-01-01
Supplement: c5ta00316d1.pdf [file c5ta00316d1.pdf]

## Supplementary Information

### Dye-sensitized solar cells containing mesoporous TiO<sub>2</sub> spheres as photoanode and methyl sulfate anion based bi-ionic liquid electrolytes

Jia-De Peng,<sup>a</sup> Chuan-Pei Lee,<sup>a</sup> D. Velayutham,<sup>b</sup> V. Suryanarayanan,<sup>\*b</sup> and Kuo-Chuan Ho<sup>\*\*a,c</sup>

<sup>a</sup>*Department of Chemical Engineering, National Taiwan University, Taipei 10617, Taiwan*

<sup>b</sup>*Electroorganic Division, CSIR-Central Electrochemical Research Institute, Karaikudi 630006, India*

<sup>c</sup>*Institute of Polymer Science and Engineering, National Taiwan University, Taipei 10617, Taiwan*

\* *To whom correspondence should be addressed: [kcho@ntu.edu.tw](mailto:kcho@ntu.edu.tw) (K. C. Ho)*

- |                                                                                                                                                                  |               |
|------------------------------------------------------------------------------------------------------------------------------------------------------------------|---------------|
| <b>S1.</b> SEM image of CSL particles                                                                                                                            | Page S2       |
| <b>S2.</b> Diffuse reflection spectra of the films of CSL and MS                                                                                                 | Page S3       |
| <b>S3.</b> The photovoltaic properties and electrochemical impedance behavior of DSSCs with different ratios of PMII/TEMAMS or PMII/EMIBF <sub>4</sub> based ILs | Page S4 to S9 |

S1. SEM image of CSL particles

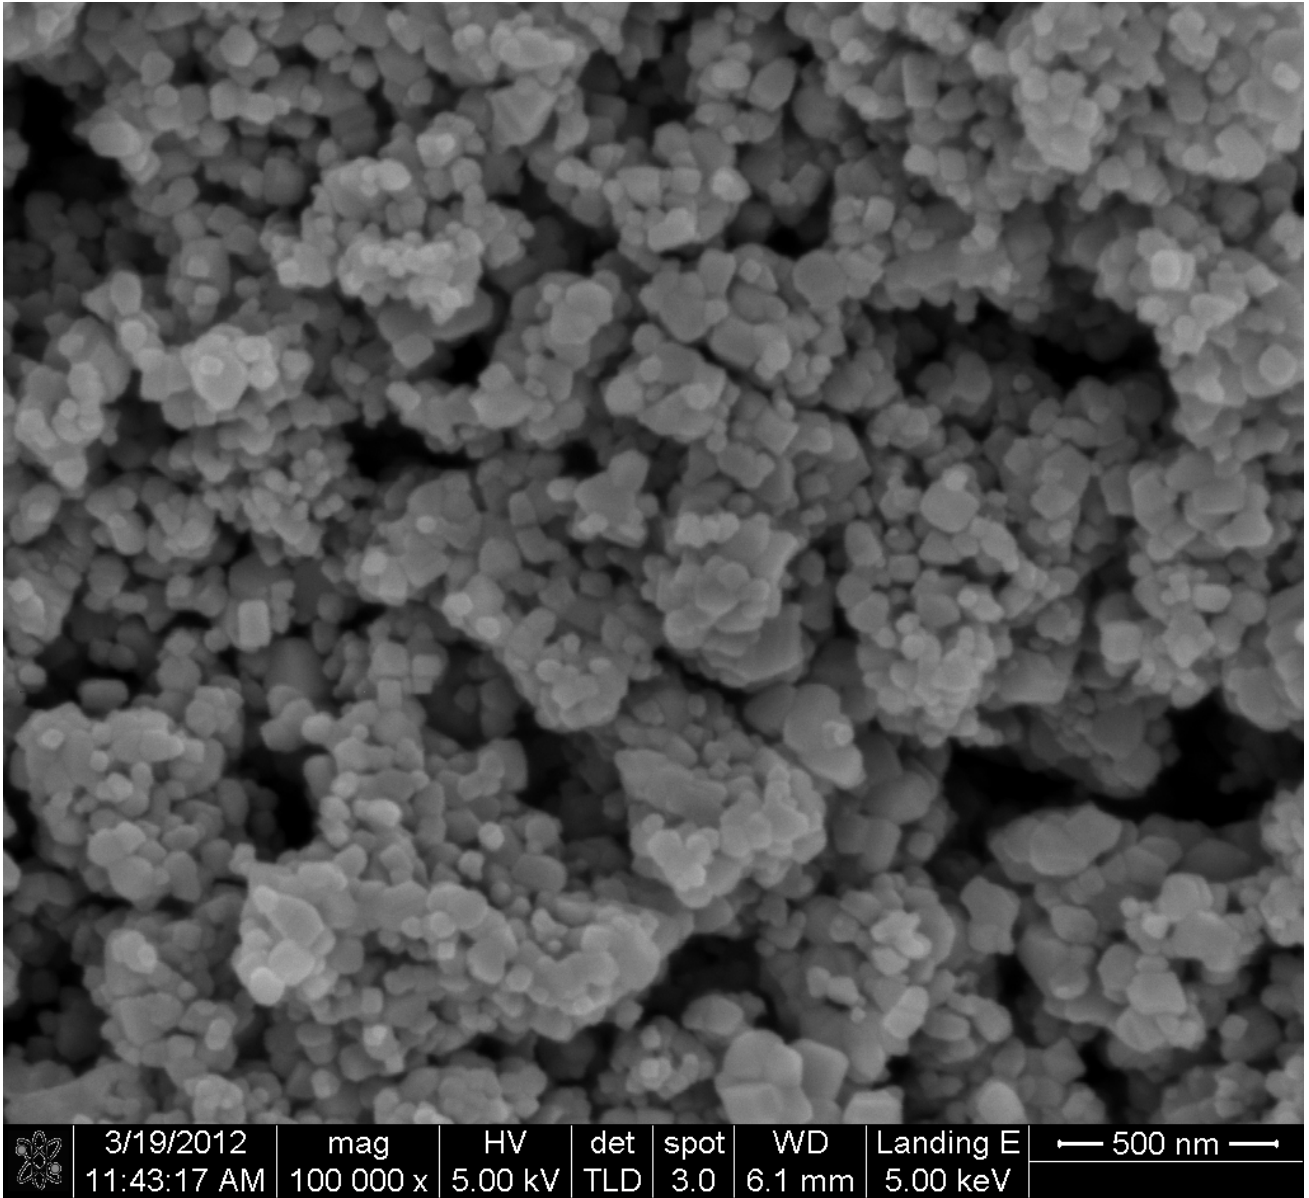

**Figure S1.** SEM image of commercial scattering layer (CSL) particles.

S2. Diffuse reflection spectra of the films of CSL and MS

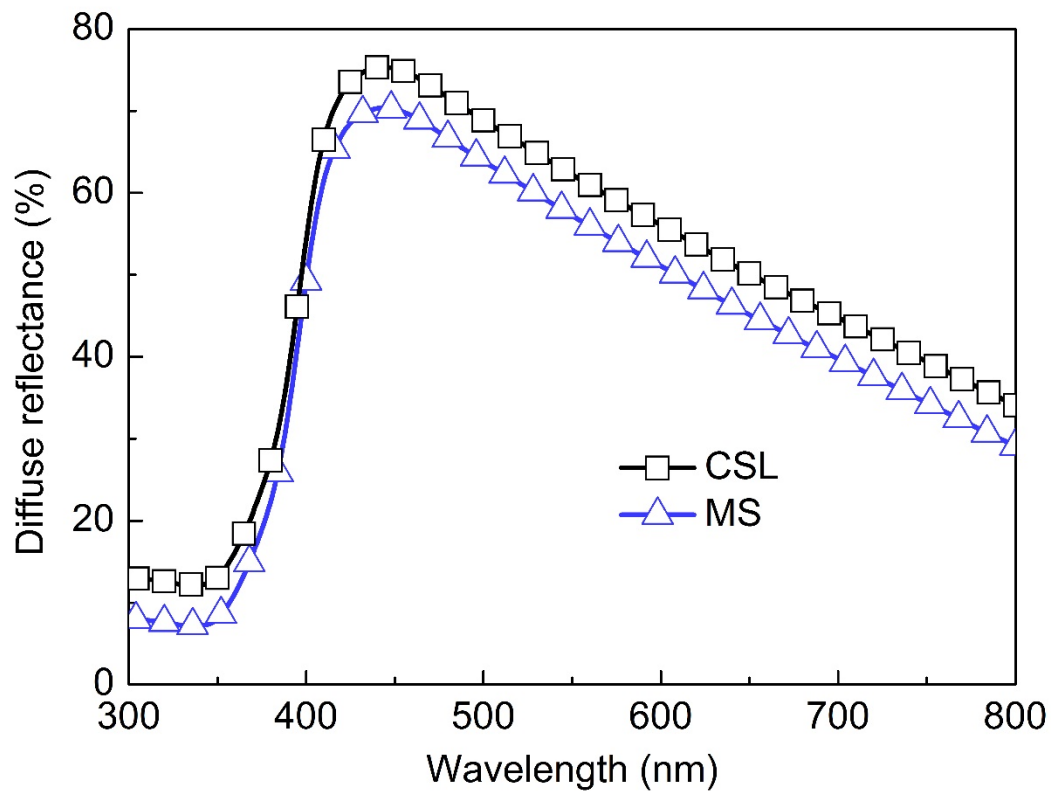

**Figure S2.** Diffuse reflection spectra of the films of commercial scattering layer (CSL) and mesoporous TiO<sub>2</sub> spheres (MS) at *ca.* 6  $\mu\text{m}$  thickness.

S3. The photovoltaic properties and electrochemical impedance behavior of DSSCs with different ratios of PMII/TEMAMS or PMII/EMIBF<sub>4</sub> based ILs

Figure S3 shows the photocurrent density-voltage curves of DSSCs fabricated with the bi-IL electrolyte consisting of 0.2 M iodine, 0.4 M NMBI, 0.15 M GuSCN with various volume ratios of PMII/TEMAMS under 100 mW/cm<sup>2</sup> illumination. The optimal volume ratio of PMII/TEMAMS (65:35 = v/v) effectively enhances the cell efficiency from 3.21 to 6.18%, as listed in Table S1. Furthermore, ionic conductivity of the PMII/TEMAMS bi-IL electrolyte initially increases as the TEMAMS content increases, reaching a maximum conductivity of  $15.36 \times 10^{-3}$  S/cm at the optimal volume ratio of PMII/TEMAMS (65:35 = v/v), and then decreases when the ratio increases. The EIS technique is also used, as shown in Figure S4, to realize the effect of various volume ratios of PMII/TEMAMS on the properties of bi-IL electrolyte. Surprisingly, the EIS spectra show that Rct2 decreases from 42.62 to 21.93  $\Omega$ , when the optimal volume ratio of PMII/TEMAMS is incorporated into the bi-IL electrolyte. Moreover, the diffusion coefficient of I<sub>3</sub><sup>-</sup> in the electrolyte ( $D(I_3^-)$ ), calculated from the EIS spectra, increases from  $0.63 \times 10^{-6}$  to  $1.73 \times 10^{-6}$  cm<sup>2</sup>/s in the presence of the optimal volume ratio of PMII/TEMAMS in the bi-IL electrolyte. However, excess of TEMAMS does not provide this beneficial effect as evidenced by the cell performance displays in Figure S3. The photocurrent density-voltage curves of DSSCs and the EIS spectra based on various volume ratios of PMII/EMIBF<sub>4</sub> bi-IL electrolyte are also shown in Figure S5 and S6, and the related experimental

data are listed in Table S2.

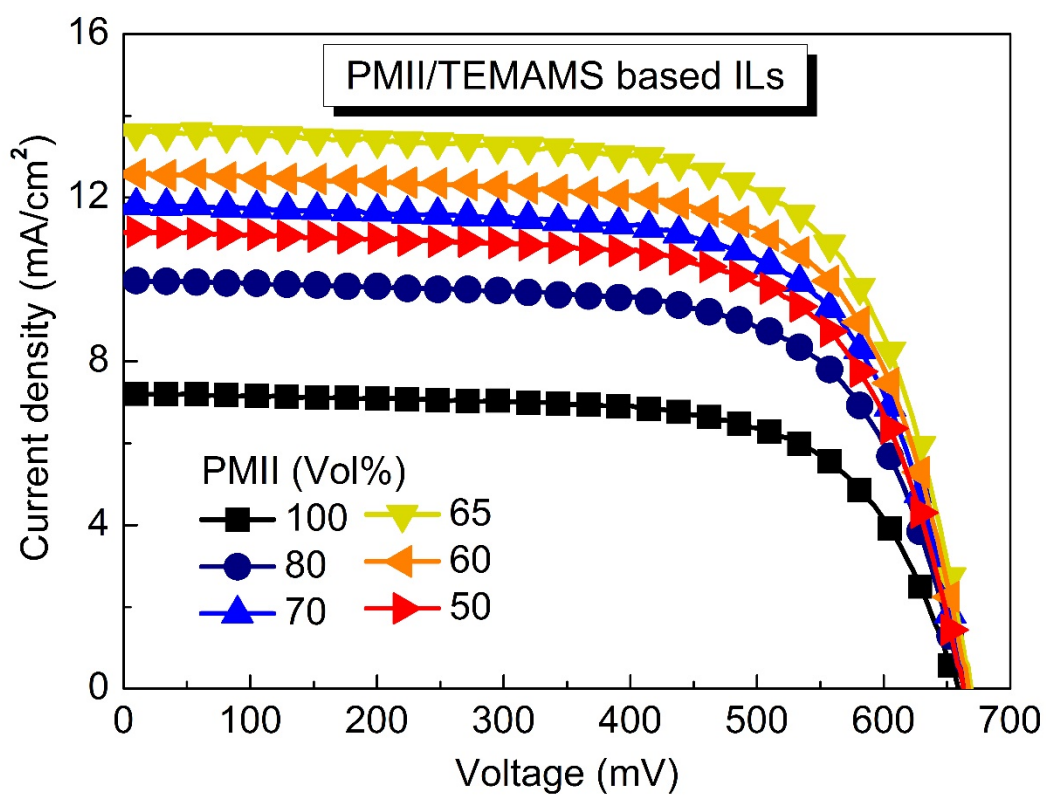

**Figure S3.** Photovoltaic properties of DSSCs with different ratios of PMII/TEMAMS based ILs, measured under 100 mW/cm<sup>2</sup>. The DSSCs are composed of photoanodes containing commercial transparent layer (CTL) and mesoporous TiO<sub>2</sub> spheres (MS) at *ca.* 15  $\mu$ m thickness.

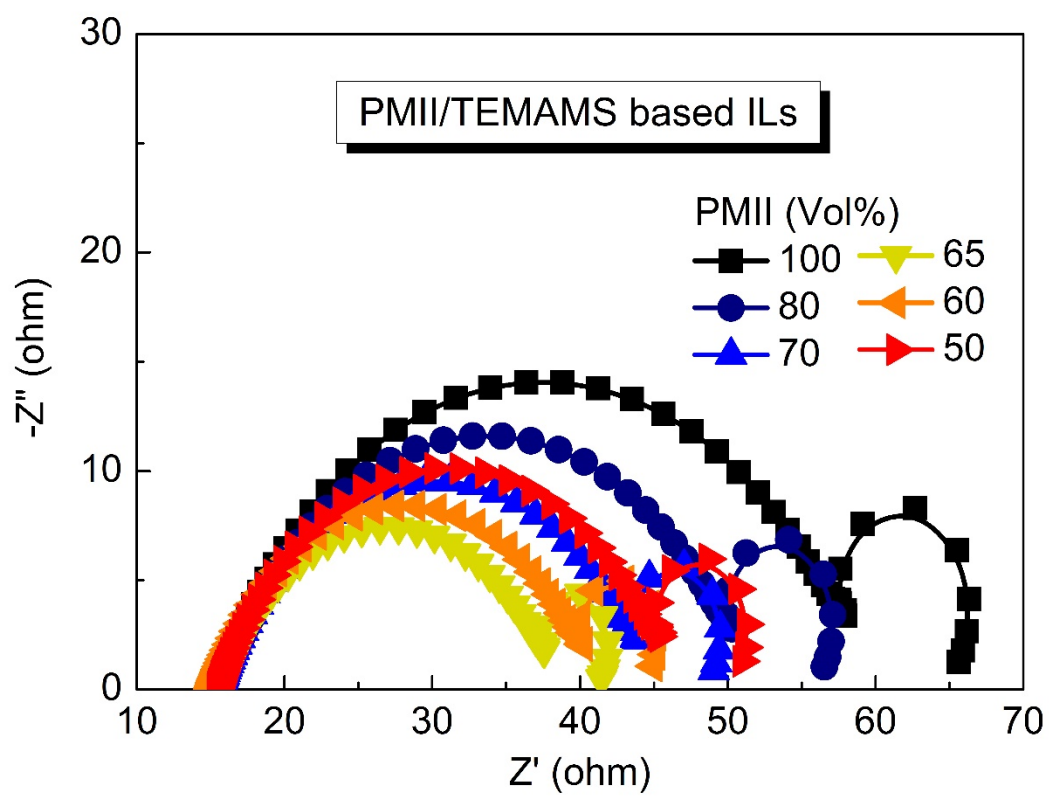

**Figure S4.** Nyquist plots of DSSCs with different ratios of PMII/TEMAMS based ILs (cell gap: 60  $\mu\text{m}$ ).

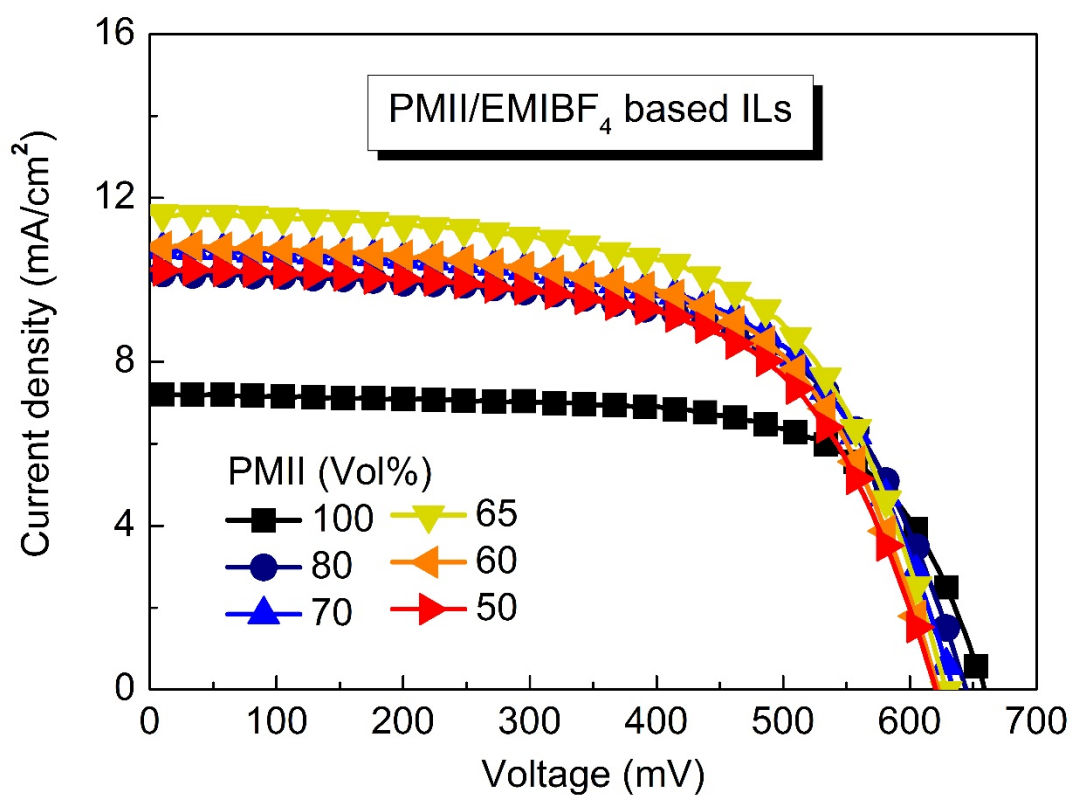

**Figure S5.** Photovoltaic properties of DSSCs with different ratios of PMII/EMIBF<sub>4</sub> based ILs, measured under 100 mW/cm<sup>2</sup>. The DSSCs are composed of photoanodes containing commercial transparent layer (CTL) and mesoporous TiO<sub>2</sub> spheres (MS) at *ca.* 15 μm thickness.

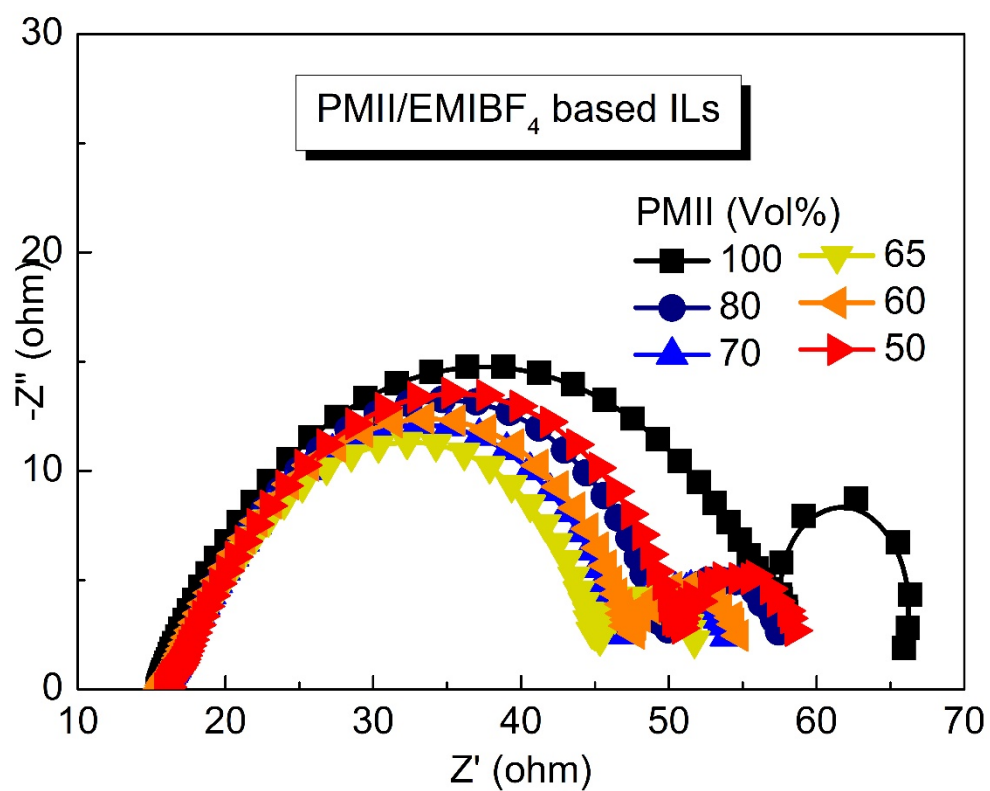

**Figure S6.** Nyquist plots of DSSCs with different ratios of PMII/EMIBF<sub>4</sub> based ILs (cell gap: 60  $\mu\text{m}$ ).



**Table S1.** Photovoltaic parameters of DSSCs, calculated by the average of 5 cells, with different ratios of PMII/TEMAMS based ILs, measured under 100 mW/cm<sup>2</sup>. The table also shows the corresponding values of the conductivity and diffusion coefficient of I<sub>3</sub><sup>-</sup> in the electrolyte ( $D(I_3^-)$ ). The DSSCs are composed of photoanodes containing commercial transparent layer (CTL) and mesoporousTiO<sub>2</sub> spheres (MS) at *ca.* 15 μm thickness.

| PMII<br>(vol%) | Conductivity<br>(×10 <sup>-3</sup> S/cm) | $J_{sc}$<br>(mA/cm <sup>2</sup> ) | $V_{oc}$<br>(mV) | $FF$         | $\eta$<br>(%) | $D(I_3^-)$<br>(×10 <sup>-6</sup> cm <sup>2</sup> /s) |
|----------------|------------------------------------------|-----------------------------------|------------------|--------------|---------------|------------------------------------------------------|
| 100            | 6.19 ± 0.15                              | 7.19 ± 0.14                       | 659 ± 5          | 0.68 ± 0.002 | 3.21 ± 0.03   | 0.63 ± 0.1                                           |
| 80             | 12.28 ± 0.19                             | 9.97 ± 0.13                       | 663 ± 3          | 0.68 ± 0.003 | 4.48 ± 0.04   | 0.90 ± 0.1                                           |
| 70             | 13.96 ± 0.17                             | 11.77 ± 0.13                      | 665 ± 3          | 0.68 ± 0.002 | 5.32 ± 0.03   | 1.36 ± 0.2                                           |
| 65             | 15.36 ± 0.17                             | 13.56 ± 0.18                      | 669 ± 5          | 0.68 ± 0.003 | 6.18 ± 0.03   | 1.73 ± 0.2                                           |
| 60             | 14.12 ± 0.18                             | 12.52 ± 0.16                      | 667 ± 4          | 0.68 ± 0.003 | 5.69 ± 0.04   | 1.49 ± 0.2                                           |
| 50             | 13.12 ± 0.16                             | 11.16 ± 0.15                      | 663 ± 5          | 0.68 ± 0.003 | 5.01 ± 0.03   | 1.12 ± 0.1                                           |

**Table S2.** Photovoltaic parameters of DSSCs, calculated by the average of 5 cells, with different ratios of PMII/EMIBF<sub>4</sub> based ILs, measured under 100 mW/cm<sup>2</sup>. The table also shows the corresponding values of the conductivity and diffusion coefficient of I<sub>3</sub><sup>-</sup> in the electrolyte ( $D(I_3^-)$ ). The DSSCs are composed of photoanodes containing commercial transparent layer (CTL) and mesoporousTiO<sub>2</sub> spheres (MS) at *ca.* 15 μm thickness.

| PMII<br>(vol%) | Conductivity<br>(×10 <sup>-3</sup> S/cm) | $J_{sc}$<br>(mA/cm <sup>2</sup> ) | $V_{oc}$<br>(mV) | $FF$         | $\eta$<br>(%) | $D(I_3^-)$<br>(×10 <sup>-6</sup> cm <sup>2</sup> /s) |
|----------------|------------------------------------------|-----------------------------------|------------------|--------------|---------------|------------------------------------------------------|
| 100            | 6.19 ± 0.15                              | 7.19 ± 0.14                       | 659 ± 5          | 0.68 ± 0.002 | 3.21 ± 0.03   | 0.63 ± 0.1                                           |
| 80             | 11.23 ± 0.12                             | 9.74 ± 0.13                       | 643 ± 4          | 0.65 ± 0.003 | 4.08 ± 0.04   | 0.79 ± 0.1                                           |
| 70             | 11.92 ± 0.16                             | 10.28 ± 0.11                      | 633 ± 3          | 0.65 ± 0.004 | 4.23 ± 0.04   | 0.86 ± 0.1                                           |
| 65             | 12.36 ± 0.16                             | 11.61 ± 0.10                      | 627 ± 5          | 0.62 ± 0.002 | 4.53 ± 0.03   | 0.93 ± 0.1                                           |
| 60             | 11.56 ± 0.16                             | 10.83 ± 0.12                      | 621 ± 4          | 0.62 ± 0.003 | 4.16 ± 0.05   | 0.82 ± 0.1                                           |
| 50             | 10.65 ± 0.12                             | 10.25 ± 0.12                      | 619 ± 3          | 0.62 ± 0.003 | 3.93 ± 0.03   | 0.73 ± 0.1                                           |
